# Supplementary material for: Highly diastereoselective ionic/radical domino reactions: single electron transfer induced cyclization of bis-sulfoxides
Source: Royal Society of Chemistry journal article supplement (doi:10.1039/b705284g), 2007-01-01

## SUPPORTING INFORMATION

### Highly Diastereoselective Ionic/Radical Tandem Reactions: Single Electron Transfer Induced Cyclization of Bis-Sulfoxides

Jean-Philippe Goddard, Catherine Gomez, Franck Brebion, Sophie Beauvière, Louis Fensterbank,\* and Max Malacria\*

Laboratoire de Chimie Organique, UMR CNRS 7611, Institut de chimie moléculaire FR 2769, Université Pierre et Marie Curie, Paris 6, case 229, 4 place Jussieu, 75252 Paris cedex 05, France

**Generalities:** All reactions were run under an argon or nitrogen atmosphere in anhydrous solvents and dried flasks. Thin layer chromatography (TLC) was performed on Merck silica gel 60 F 254 and revealed with either an ultraviolet lamp ( $\lambda=254$  nm) or a *p*-anisaldehyde solution. Flash column chromatography was performed with Silica gel Merck Geduran SI (40-63 nm). Solvents were systematically distilled prior to be used. TEMPO was sublimated under vacuum (80 °C, 0.05 atm) prior to be used. IR spectra were recorded on a Perkin-Elmer 1420 spectrometer and on a Bruker Tensor 27.  $^1\text{H}$  and  $^{13}\text{C}$  NMR spectra were recorded at room temperature at 400 MHz and 100 MHz respectively on an ARX400 Bruker spectrometer. Shifts are given in ppm and referenced from the solvent residual signal (7.26 ppm for  $\text{CDCl}_3$ ) for proton NMR. For carbon NMR, shifts are referenced from the solvent central peak (77.3 ppm for  $\text{CDCl}_3$ ). Coupling constants (*J*) are given in Hertz (Hz). The letters m, s, d, t, q, hept mean respectively multiplet, singlet, doublet, triplet, quadruplet, heptuplet. Optical rotations were measured on a Perkin Elmer 343 polarimeter. Elemental analysis were performed by the Service Régional de Microanalyse de l'Université Pierre et Marie Curie. Melting points were obtained on a Reichert apparatus and are uncorrected.

#### Alkylidene bis-sulfoxides

The general procedure for the synthesis of alkylidene bis-sulfoxides and spectral data of **8**, **14**, **15** and **24** were previously described.<sup>1,2</sup>

---

<sup>1</sup> F. Brebion, B. Delouvrié, F. Nájera, L. Fensterbank, M. Malacria, J. Vaissermann, *Angew. Chem. Int. Ed.*, 2003, **42**, 5342.

<sup>2</sup> F. Brebion, J.-P. Goddard, C. Gomez, L. Fensterbank, M. Malacria, *Synthesis*, 2005, 2449.

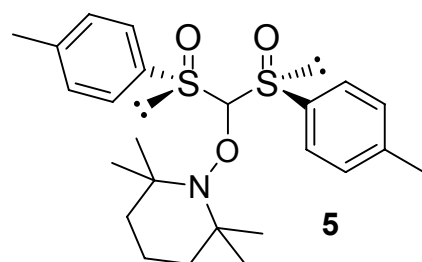

$C_{24}H_{33}NO_3S_2$   
Mol. Wt.: 447.65 g/mol

A solution of the bis-sulfoxide **1-H** (292 mg, 1 mmol, 1 equiv) in 5 mL of anhydrous THF at  $-40\text{ }^\circ\text{C}$  is added *n*-BuLi (0.480 mL, 1.1 mmol, 1.1 equiv, 2.3 M in hexanes). The resulting solution is stirred at this temperature for 30 min. Then, TEMPO (312 mg, 2 mmol, 2 equiv) and ferrocenium hexafluorophosphate **4a** (331 mg, 1 mmol, 1 equiv) are added in one portion. The reaction mixture is stirred at this temperature for 2 h. Then, the reaction is stopped by addition of a saturated aqueous  $NH_4Cl$  solution. The crude mixture is filtered over a celite pad to remove solid residues and the resulting solution is dried over anhydrous  $MgSO_4$ , filtered and concentrated under vacuum. The crude is purified by flash chromatography over silica gel (petroleum ether/ethyl acetate : 6/4) to afford **5** as a yellow solid (161 mg, 34%). M.p.  $92\text{ }^\circ\text{C}$ ;  $[\alpha]_D^{20} +138$  (c 1.00;  $CHCl_3$ ). IR (neat) 3042, 2922, 1096, 1063, 1050,  $809\text{ cm}^{-1}$ .  $^1H$  NMR (400 MHz,  $CDCl_3$ )  $\delta$  0.78 (s, 3H), 1.02 (s, 3H), 1.24 (s, 3H), 1.28-1.39 (m, 2H), 1.40-1.60 (m, 7H), 2.37 (s, 3H), 2.45 (s, 3H), 5.40 (s, 1H), 7.17 (d,  $J = 8.1\text{ Hz}$ , 2H), 7.23 (d,  $J = 8.1\text{ Hz}$ , 2H), 7.33 (d,  $J = 8.1\text{ Hz}$ , 2H), 7.49 (d,  $J = 8.1\text{ Hz}$ , 2H).  $^{13}C$  NMR (100 MHz,  $CDCl_3$ )  $\delta$  16.9 ( $CH_2$ ), 20.9 ( $CH_3$ ), 21.1 ( $CH_3$ ), 21.6 (2  $CH_3$ ), 33.5 ( $CH_3$ ), 34.2 ( $CH_3$ ), 40.7 ( $CH_2$ ), 40.8 ( $CH_2$ ), 62.0 (C), 62.9 (C), 116.5 (C), 125.2 (2 CH), 125.3 (2 CH), 129.8 (2 CH), 130.0 (2 CH), 137.7 (C), 138.7 (C), 141.6 (C), 141.8 (C). Anal. Calc. for  $C_{24}H_{33}NO_3S_2$ : C 64.39; H 7.43; N 3.13. Found: C 64.51; H 8.18; N 2.52.

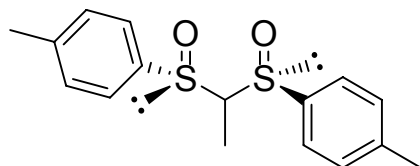

$C_{16}H_{18}O_2S_2$   
Mol. Wt.: 306.44 g/mol

**1-Me**

Following the reported procedure<sup>3</sup> from bis-sulfoxide **1-H** (1 g, 3.4 mmol), **1-Me** is obtained (769 mg, 73%) as a white solid: m.p.  $119\text{-}121\text{ }^\circ\text{C}$ ;  $[\alpha]_D^{20} +308.9$  (c 1.00;  $CHCl_3$ ). IR (neat) 3051, 2923, 2868, 1650, 1492, 1084, 1051, 1016,  $811\text{ cm}^{-1}$ .  $^1H$  NMR (400 MHz,  $CDCl_3$ )  $\delta$  1.10 (d,  $J = 7.1\text{ Hz}$ , 3H), 2.40 (s, 3H), 2.44 (s, 3H), 3.55 (q,  $J = 7.0\text{ Hz}$ , 1H), 7.31 (d,  $J = 8.1\text{ Hz}$ , 2H), 7.36 (d,  $J = 8.3\text{ Hz}$ , 2H), 7.41 (d,  $J = 8.3\text{ Hz}$ , 2H), 7.63 (d,  $J = 8.3\text{ Hz}$ , 2H).  $^{13}C$  NMR (100 MHz,  $CDCl_3$ )  $\delta$  4.1 ( $CH_3$ ), 21.4 ( $CH_3$ ), 21.6 ( $CH_3$ ), 85.1 (CH), 124.2 (CH), 125.4 (CH), 130.1 (CH), 130.2 (CH), 137.8 (C), 138.3 (C), 141.8 (C), 143.0 (C).

<sup>3</sup> N. Khiar, I. Fernandez, F. Alcudia, *Tetrahedron Lett.*, 1993, **34**, 123.

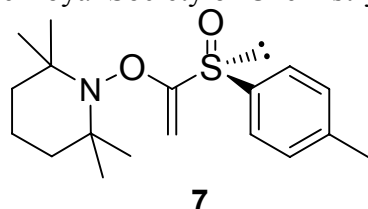

$C_{18}H_{27}NO_2S$   
Mol. Wt.: 321.47 g/mol

A solution of the **1-Me** (950 mg, 3.1 mmol, 1 equiv) in anhydrous THF (10 mL) is cooled to  $-78^{\circ}C$ . To this solution, *n*-BuLi (1.55 mL, 3.75 mmol, 1.2 equiv, 2.4 M in hexanes,) is added dropwise and the solution is stirred for 40 min at this temperature. Then, the solution is warmed to  $-40^{\circ}C$  and TEMPO (967 mg, 6.2 mmol, 2 equiv) and ferrocenium hexafluorophosphate (1.03g, 3.1 mmol, 1 equiv) are added in one portion. The reaction is monitored by TLC and after 10 hours at  $-40^{\circ}C$ , the reaction is hydrolyzed by a saturated aqueous solution of  $NH_4Cl$ . The aqueous phase is extracted by ethyl acetate (3x20 mL) and the resulting organic phases are dried over anhydrous  $MgSO_4$ , filtered and the solvent is removed under vacuum. The crude is purified by flash chromatography over silica gel (petroleum ether/diethyl ether: 8/2) to afford **7** as a pink oil (766 mg, 77%).  $[\alpha]_D^{20} +111$  (c 1.50;  $CHCl_3$ ). IR (neat) 3030, 2976, 1628, 1492, 1086, 1060, 810  $cm^{-1}$ .  $^1H$  NMR (400 MHz,  $CDCl_3$ )  $\delta$  0.72 (s, 3H), 0.86 (s, 3H), 0.96 (s, 3H), 0.99 (s, 3H), 1.25-1.6 (m, 6H), 2.40 (s, 3H), 5.07 (d,  $J = 2.3$  Hz, 1H), 5.17 (d,  $J = 2.3$  Hz, 1H), 7.29 (d,  $J = 8.3$  Hz, 2H), 7.63 (d,  $J = 8.3$  Hz, 2H).  $^{13}C$  NMR (100 MHz,  $CDCl_3$ )  $\delta$  16.8 ( $CH_2$ ), 20.2 ( $CH_3$ ), 20.8 ( $CH_3$ ), 21.5 ( $CH_3$ ), 31.7 ( $CH_3$ ), 32.2 ( $CH_3$ ), 39.7 (2  $CH_2$ ), 61.1 (C), 61.3 (C), 88.7 ( $CH_2$ ), 125.3 (2 CH), 129.5 (2 CH), 139.3 (C), 141.7 (C), 166.7 (C). Anal. Calc. for  $C_{18}H_{27}NO_2S$ : C 67.25; H 8.47; N 4.36. Found: C 67.62; H 8.51; N 4.09.

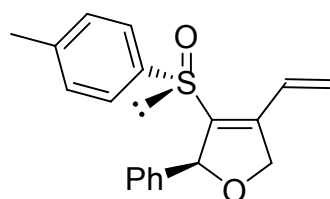

$C_{19}H_{18}O_2S$   
Mol. Wt.: 310.41 g/mol

To a solution of alcohol **9**<sup>4</sup> (104 mg, 0.58 mmol, 1 equiv) in anhydrous THF (3 mL) at  $0^{\circ}C$  is added a suspension of NaH 60% in mineral oil (27 mg, 0.68 mmol, 1.3 equiv). The solution is stirred at  $0^{\circ}C$  for 30 min and cooled to  $-20^{\circ}C$ . Then, a solution of benzylidene **8** (200 mg, 0.52 mmol, 1 equiv) in anhydrous THF (3 mL) is added. The solution is stirred at  $-20^{\circ}C$  and monitored by TLC. After 3 hours, ferrocenium hexafluorophosphate (522 mg, 1.58 mmol, 3 equiv) is added in one portion and the reaction is gently warmed to room temperature during 6 hours. The reaction is hydrolyzed by addition of a saturated aqueous solution of  $NH_4Cl$ . The crude mixture is extracted by diethyl ether (3x30 mL) and the resulting organic phases are washed with water (2x10 mL), dried over anhydrous  $MgSO_4$ , filtered and the solvent is removed under vacuum. The crude is purified by flash chromatography over silica gel (pentane/diethyl ether: from 8/2 to 5/5) to afford **10** as a colorless oil (56 mg, 35%).  $[\alpha]_D^{20} +171$  (c 1.09;  $CHCl_3$ ). IR (neat) 3019, 2953, 2924, 2868, 1710, 1578, 1492, 1046, 807  $cm^{-1}$ .  $^1H$  NMR (400 MHz,  $CDCl_3$ )  $\delta$  2.30 (s, 3H), 5.00 (dd,  $J = 13.2, 2.9$  Hz, 1H), 5.17 (dd,  $J = 13.2, 5.0$  Hz, 1H), 5.41 (d,  $J = 17.7$  Hz, 1H), 5.61 (d,  $J = 10.8$  Hz, 1H), 5.87 (dd,  $J = 5.0, 2.9$  Hz, 1H), 6.96-7.15 (m, 9H), 7.34 (dd,  $J = 17.7, 10.8$  Hz, 1H).  $^{13}C$  NMR (100 MHz,  $CDCl_3$ )  $\delta$  21.3 ( $CH_3$ ), 75.2 ( $CH_2$ ), 87.5 (CH), 122.1 ( $CH_2$ ), 124.3 (CH), 126.0 (CH), 127.7 (CH), 128.1 (2CH), 129.5 (CH), 138.0 (C), 139.1 (C), 139.2 (C), 140.9 (C), 143.7 (C). HRMS: Calc. for  $C_{19}H_{18}O_2SNa$   $[M+Na]^+$  333.0925, found 333.0901

<sup>4</sup> For the preparation of alcohol **9**, see: Y. Ichinose, K. Oshima, K. Utimoto, *Chem. Lett.*, 1988, 1437.

**Typical procedure for the preparation tetrahydrofuran derivatives by 5-exo-cyclization.**

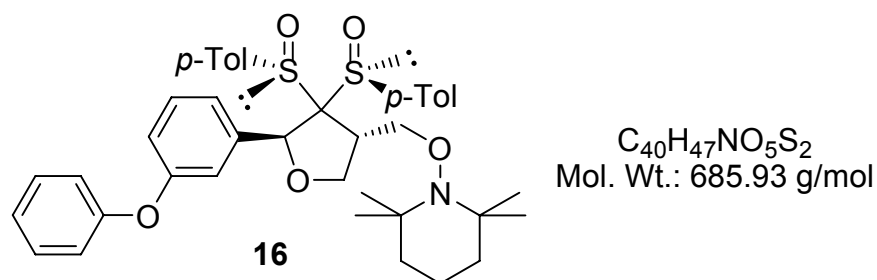

To a solution of allylic alcohol (43  $\mu$ L, 0.63 mmol, 1.5 equiv) in anhydrous THF (5 mL), cooled to  $-40$   $^{\circ}$ C, is added dropwise *n*-BuLi (0.270 mL, 0.59 mmol, 1.4 equiv, 2.2 M in hexanes) and the solution is stirred for 30 min at this temperature. Then, phenoxybenzylidene bis-sulfoxide **14** (200 mg, 0.42 mmol, 1 equiv) is added as an anhydrous THF (5 mL) solution. The reaction is stirred until disappearance of starting material (monitored by TLC, diethyl ether/petroleum ether: 8/2) and the solution is warmed to  $-20$   $^{\circ}$ C. TEMPO (132 mg, 0.84 mmol, 2 equiv) and ferrocenium tetrafluoroborate (366 mg, 1.26 mmol, 3 equiv) are added in one portion. The reaction is monitored by TLC and after 2 hours at  $-20$   $^{\circ}$ C, the reaction is hydrolyzed by a saturated aqueous solution of  $NH_4Cl$ . The crude mixture is extracted with ethyl acetate (3x30 mL) and the resulting organic phases are washed with brine (2x10 mL), dried over anhydrous  $MgSO_4$ , filtered and the solvent is removed under vacuum. The crude is purified by flash chromatography over silica gel (petroleum ether/diethyl ether: from 8/2 to 6/4) to afford **16** as a colorless oil (162 mg, 56%).  $[\alpha]_D^{20} + 93$  (c 1.00;  $CHCl_3$ ). IR (neat) 3028, 2971, 2930, 1584, 1490, 1243, 1083, 1052, 808  $cm^{-1}$ .  $^1H$  NMR (400 MHz,  $CDCl_3$ )  $\delta$  0.77 (s, 3H), 1.07 (s, 3H), 1.08 (s, 3H), 1.14 (s, 3H), 1.22-1.56 (m, 6H), 2.36 (s, 3H), 2.44 (s, 3H), 3.17 (dd,  $J = 7.8, 4.0$  Hz, 1H), 3.67-3.76 (m, 1H), 3.93 (dd,  $J = 10.9, 8.1$  Hz, 1H), 4.40 (dd,  $J = 11.1, 7.8$  Hz, 1H), 4.52 (m, 1H), 5.47 (s, 1H), 5.51 (s, 1H), 6.80-6.88 (m, 4H), 7.05 (m, 1H), 7.14 (m, 1H), 7.27-7.32 (m, 4H), 7.37 (d,  $J = 8.1$  Hz, 2H), 7.74-7.79 (m, 4H).  $^{13}C$  NMR (100 MHz,  $CDCl_3$ )  $\delta$  17.0 ( $CH_2$ ), 20.0 ( $CH_3$ ), 21.5 ( $CH_3$ ), 22.7 (2  $CH_3$ ), 33.1 (2  $CH_3$ ), 39.6 (CH and 2  $CH_2$ ), 59.6 (C), 59.9 (C), 72.3 ( $CH_2$ ), 74.1 ( $CH_2$ ), 80.5 (CH), 88.2 (C), 117.3 (2CH), 119.6 (CH), 120.2 (CH), 122.3 (CH), 125.1 (2 CH), 126.2 (3 CH), 128.5 (CH), 129.5 (2 CH), 130.4 (2 CH), 130.7 (2 CH), 135.9 (C), 136.0 (C), 137.6 (C), 142.5 (C), 143.6 (C), 154.8 (C), 158.2 (C). HRMS: Calc. for  $C_{40}H_{47}NO_5S_2Na$   $[M+Na]^+$  708.2794, found 708.2780.

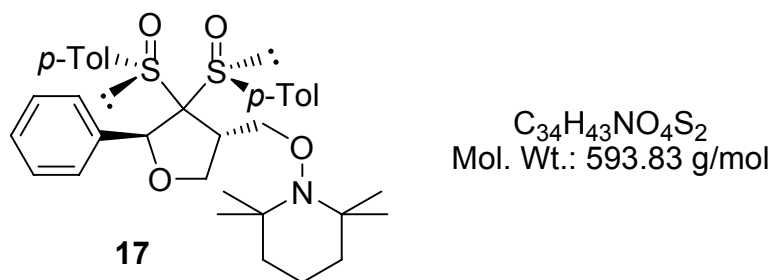

Following the same procedure that gives **16** from **14**, compound **8** (380 mg, 1 mmol) afforded **17** (352 mg, 59%) as a colorless oil:  $[\alpha]_D^{20} + 142$  (c 0.98;  $CHCl_3$ ). IR (neat) 3021, 2956, 2891, 1569, 1430, 1086, 807  $cm^{-1}$ .  $^1H$  NMR (400 MHz,  $CDCl_3$ )  $\delta$  0.78 (s, 3H,  $CH_3$ ), 1.05-1.69 (m, 15H), 2.42 (s, 3H,  $CH_3$ ), 2.58 (s, 3H,  $CH_3$ ), 3.21 (dd,  $J = 7.3, 3.5$  Hz, 1H), 3.75 (m, 1H), 3.89 (dd,  $J = 10.6, 8.1$  Hz, 1H), 4.40 (dd,  $J = 10.6, 8.1$  Hz, 1H), 4.52 (dd,  $J = 7.6, 7.3$  Hz, 1H), 5.43 (s, 1H), 6.47 (d,  $J = 7.6$  Hz, 2H), 6.90-7.08 (m, 3H), 7.34 (d,  $J = 7.8$  Hz, 2H), 7.50 (d,  $J = 8.1$  Hz, 2H), 7.71 (d,  $J = 7.8$  Hz, 2H), 7.82 (d,  $J = 8.1$  Hz, 2H).  $^{13}C$  NMR (100 MHz,  $CDCl_3$ )  $\delta$  17.1 ( $CH_2$ ), 20.3 ( $CH_3$ ), 21.1 ( $CH_3$ ), 22.2 (2  $CH_3$ ), 34.2 (2  $CH_3$ ), 38.9 (CH

and 2 CH<sub>2</sub>), 60.2 (C), 60.7 (C), 72.3 (CH<sub>2</sub>), 74.1 (CH<sub>2</sub>), 80.5 (CH), 88.2 (C), 121.3 (2 CH), 123.1 (2 CH), 126.1 (CH), 126.6 (2 CH), 128.5 (2 CH), 129.5 (2 CH), 130.4 (CH), 130.7 (CH), 135.9 (C), 136.0 (C), 137.6 (C), 142.5 (C), 143.6 (C). HRMS: Calc. for C<sub>34</sub>H<sub>44</sub>NO<sub>4</sub>S<sub>2</sub> [M+H]<sup>+</sup> 594.2712, found 594.2704.

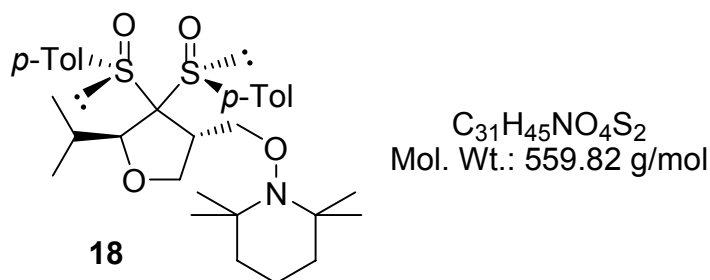

Following the same procedure that gives **16** from **14**, compound **15** (346 mg, 1 mmol) afforded **18** (230 mg, 41%) as a colorless oil: [ $\alpha$ ]<sub>D</sub><sup>20</sup> + 129 (c 1.04; CHCl<sub>3</sub>). IR (neat) 3032, 2946, 2851, 1558, 1432 cm<sup>-1</sup>. <sup>1</sup>H NMR (400 MHz, CDCl<sub>3</sub>)  $\delta$  0.45 (d, *J* = 6.8 Hz, 3H), 0.60 (s, 3H, CH<sub>3</sub>), 1.01 (d, *J* = 6.8 Hz, 3H), 1.05-1.69 (m, 9H), 1.30-1.55 (m, 6H), 2.45 (s, 3H), 2.48-2.58 (m, 4H), 3.28-3.36 (m, 1H), 3.51 (dd, *J* = 8.8, 3.5 Hz, 1H), 3.90 (dd, *J* = 10.8, 8.8 Hz, 1H), 4.26-4.33 (m, 2H), 4.53 (dd, *J* = 7.8, 7.6 Hz, 1H), 7.30 (d, *J* = 8.2 Hz, 2H), 7.74 (d, *J* = 8.2 Hz, 2H), 8.08 (d, *J* = 8.3 Hz, 2H), 8.11 (d, *J* = 8.3 Hz, 2H). <sup>13</sup>C NMR (100 MHz, CDCl<sub>3</sub>)  $\delta$  15.1 (CH<sub>2</sub>), 18.0 (2CH<sub>3</sub>), 18.3 (CH<sub>3</sub>), 19.4 (CH<sub>3</sub>), 19.9 (CH<sub>3</sub>), 20.1 (CH<sub>3</sub>), 26.7 (2 CH<sub>3</sub>), 30.8 (CH<sub>2</sub>), 31.0 (CH<sub>2</sub>), 37.8 (CH), 48.2 (CH), 57.8 (C), 57.9 (C), 69.8 (CH<sub>2</sub>), 71.0 (CH<sub>2</sub>), 90.9 (CH), 94.2 (C), 127.4 (2 CH), 127.6 (2 CH), 130.1 (2 CH), 130.7 (2 CH), 133.2 (C), 134.4 (C), 143.7 (C), 144.5 (C). HRMS: Calc. for C<sub>31</sub>H<sub>46</sub>NO<sub>4</sub>S<sub>2</sub> [M+H]<sup>+</sup> 560.2869, found 560.2880.

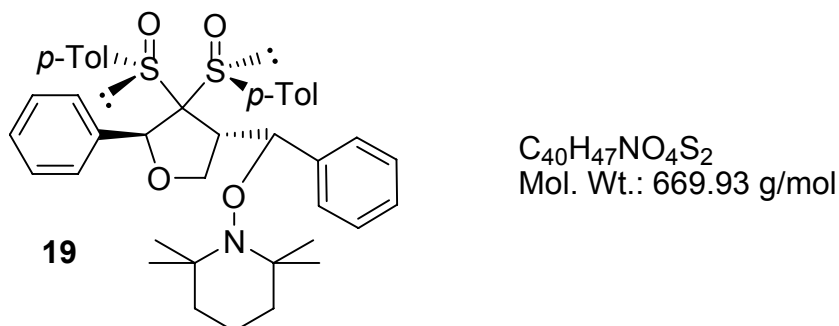

Following the same procedure that gives **16** from **14** applied to cinnamyl alcohol, compound **8** (380 mg, 1 mmol) afforded **19** (321 mg, 48%) as a colorless oil and a mixture of diastereoisomers (1.1:1). <sup>1</sup>H NMR (400 MHz, CDCl<sub>3</sub>)  $\delta$  0.78 (s, 3H, major), 0.87 (s, 3H, minor), 1.13 (s, 3H, major), 1.15 (s, 3H, minor), 1.24 (s, 3H, major), 1.25 (s, 3H, minor), 1.30-1.75 (m, 18H), 2.26 (bs, 6H), 2.35 (s, 3H, major), 2.41 (s, 3H, minor), 4.77 (dd, *J* = 13.6, 4.0 Hz, 1H, minor), 5.03 (dd, *J* = 14.2, 5.3 Hz, 1H, major), 5.14-5.22 (m, 4H), 5.43 (dd, *J* = 9.1, 4.5 Hz, 1H, minor), 5.85 (dd, *J* = 5.1, 2.3 Hz, 1H, major), 6.44 (s, 1H, major), 6.59 (s, 1H, minor), 6.74 (d, *J* = 8.3 Hz, 1H, major), 6.88-7.21 (m, 33H), 7.39 (d, *J* = 8.2 Hz, 2H, minor). <sup>13</sup>C NMR (100 MHz, CDCl<sub>3</sub>)  $\delta$  17.1 (CH<sub>2</sub>), 17.3 (CH<sub>2</sub>), 20.3 (2 CH<sub>3</sub>), 20.4 (3 CH<sub>3</sub>), 20.6 (3 CH<sub>3</sub>), 21.3 (2 CH<sub>3</sub>), 21.5 (2 CH<sub>3</sub>), 33.6 (2 CH<sub>2</sub>), 33.8 (2 CH<sub>2</sub>), 34.0 (CH), 34.2 (CH), 59.7 (2 C), 60.0 (2 C), 60.2 (C), 74.6 (CH<sub>2</sub>), 75.0 (CH<sub>2</sub>), 81.9 (CH), 83.1 (CH), 86.6 (CH), 87.6 (CH), 90.2 (C), 91.6 (C), 124.7 (CH), 126.1 (CH), 126.7 (CH), 126.8 (CH), 127.4 (2 CH), 127.8 (2 CH), 127.9 (2 CH), 128.1 (2 CH), 128.2 (2 CH), 128.5 (2 CH), 128.6 (2 CH), 128.8 (2 CH), 129.3 (2 CH), 129.6 (2 CH), 135.7 (C), 135.9 (C), 137.2 (C), 137.8 (C), 138.7 (C), 139.5 (C), 140.8 (C), 141.1 (C), 141.3 (C), 141.8 (C), 149.9 (C), 150.9 (C).

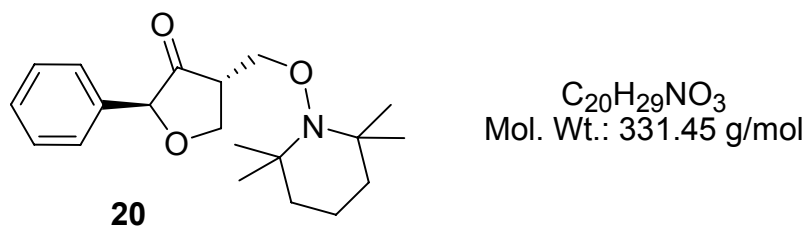

To a suspension of In (118 mg, 1 mmol) in anhydrous THF (20 mL) at room temperature, is added  $TiCl_4$  (261  $\mu$ L, 2.4 mmol).<sup>5</sup> The dark-blue mixture is stirred at room temperature for 1 h. To a solution of **17** (190 mg, 0.32 mmol) in anhydrous THF (5 mL) at room temperature is added 6.4 mL (2.4 equiv of Ti species) of the previously prepared Ti/In complex solution. After 30 min, a saturated aqueous solution of  $NH_4Cl$  (20 mL) is added, the resulting mixture is stirred for 10 min and extracted by dichloromethane (3x25 mL). The organic phases are dried over anhydrous  $MgSO_4$ , filtered and the solvent is removed under vacuum. The crude is purified by flash chromatography over silica gel (pentane/diethylether: 9/1) to afford **20** as a colorless oil (36 mg, 34%):  $[\alpha]_D^{20} - 49.8$  (c 1.00;  $CHCl_3$ ). IR (neat) 2991, 2928, 2853, 1762, 1452, 1374, 1055, 968  $cm^{-1}$ .  $^1H$  NMR (400 MHz,  $CDCl_3$ )  $\delta$  1.09 (s, 3H), 1.13 (s, 3H), 1.18 (s, 3H), 1.21 (s, 3H), 1.27-1.55 (m, 6H), 2.82-2.89 (m, 1H), 4.01 (dd,  $J = 9.1, 3.5$  Hz, 1H), 4.15 (dd,  $J = 9.1, 5.8$  Hz, 1H), 4.33 (t,  $J = 9.5$  Hz, 1H), 4.69 (t,  $J = 9.1$  Hz, 1H), 4.73 (s, 1H), 7.33-7.39 (m, 5H).  $^{13}C$  NMR (100 MHz,  $CDCl_3$ )  $\delta$  17.0 ( $CH_2$ ), 20.1 (CH), 29.7 ( $CH_3$ ), 30.3 ( $CH_3$ ), 32.9 ( $CH_3$ ), 33.1 ( $CH_3$ ), 39.6 ( $CH_2$ ), 39.7 ( $CH_2$ ), 60.0 (C), 60.2 (C), 68.0 ( $CH_2$ ), 72.3 ( $CH_2$ ), 82.1 (CH), 126.2 (2CH), 128.2 (CH), 128.5 (2CH), 135.8 (C), 212.3 (C). HRMS: Calc. for  $C_{20}H_{30}NO_3$   $[M+H]^+$  332.2220, found 332.2222.

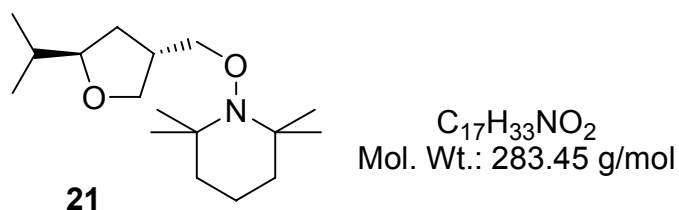

To a solution of **18** (50 mg, 0.09 mmol) in anhydrous THF (1 mL) is added at room temperature a freshly prepared  $SmI_2$  solution<sup>6</sup> (5.4 mL, 0.54 mmol, 0.1 mol/L in THF). The reaction mixture is stirred until disappearance of the typical blue color. The resulting grey suspension is hydrolyzed by a saturated aqueous solution of  $NH_4Cl$  (5 mL) and extracted by dichloromethane (3x10 mL). The organic phases are dried over anhydrous  $MgSO_4$ , filtered and the solvent is removed under vacuum. The crude is purified by flash chromatography over silica gel (pentane/diethylether: 95/5) to afford **21** as a colorless oil (22 mg, 88%):  $[\alpha]_D^{20} + 38$  (c 1.00;  $CHCl_3$ ). IR (neat) 2960, 2931, 1443, 1376, 1106, 951  $cm^{-1}$ .  $^1H$  NMR (400 MHz,  $CDCl_3$ )  $\delta$  0.89 (d,  $J = 6.8$  Hz, 3H), 0.98 (d,  $J = 6.8$  Hz, 3H), 1.05-1.13 (m, 6H), 1.15-1.19 (m, 6H), 1.29-1.51 (m, 6H), 1.65-1.78 (m, 3H), 2.44-2.52 (m, 1H), 3.54-3.59 (m, 2H), 3.68-3.79 (m, 2H), 4.01 (dd,  $J = 8.6, 7.3$  Hz, 1H).  $^{13}C$  NMR (100 MHz,  $CDCl_3$ )  $\delta$  17.1 ( $CH_2$ ), 18.6 ( $CH_3$ ), 19.3 ( $CH_3$ ), 20.1 (CH), 32.3 (2  $CH_2$ ), 33.1 (2  $CH_3$ ), 33.2 (2  $CH_3$ ), 38.6 (CH), 39.6 ( $CH_2$ ), 59.8 (2C), 70.9 ( $CH_2$ ), 78.2 ( $CH_2$ ), 84.3 (CH). HRMS: Calc. for  $C_{17}H_{33}NO_2$   $[M+H]^+$  284.2590, found 284.2597.

<sup>5</sup> B. W. Yoo, K. H. Choi, D. Y. Kim, K. I. Choi, J. H. Kim, *Synth. Commun.*, 2003, **33**, 53.

<sup>6</sup> S. Bezzenine-Lafollée, F. Guibé, H. Villar, R. Zriba, *Tetrahedron*, 2004, **60**, 6931.

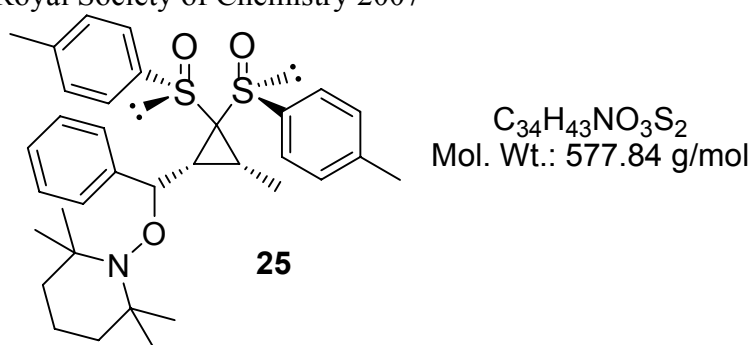

To a suspension of CuI (375 mg, 1.97 mmol, 4 equiv) in anhydrous THF (5 mL) at 0 °C is added a solution of MeLi (1.23 mL, 1.97 mmol, 4 equiv, 1.6 M in diethyl ether). The suspension disappeared then a yellow precipitate appeared. The resulting yellow mixture is stirred for 30 min and cooled to -78 °C. A solution of dienyl bis-sulfoxide **24** (200 mg, 0.49 mmol, 1 equiv) in anhydrous THF (5 mL) is added to the organocopper suspension and the solution is warmed to -20 °C in 1 hour. Then, TEMPO (384 mg, 2.46 mmol, 5 equiv) and ferrocenium tetrafluoroborate (620 mg, 2.46 mmol, 5 equiv) are added in one portion. The reaction is monitored by TLC and after 3 hours at -20 °C, the reaction is hydrolyzed by a saturated aqueous solution of NH<sub>4</sub>Cl. The crude mixture is extracted by ethyl acetate (3x30 mL) and the resulting organic phases are washed with brine (2x10 mL), dried over anhydrous MgSO<sub>4</sub>, filtered and the solvent is removed under vacuum. The crude is purified by flash chromatography over silica gel (ethyl acetate/pentane: 4/6) to afford **25** as a gummy solid (151 mg, 53%).  $[\alpha]_D^{20} + 157$  (c 0.90; CHCl<sub>3</sub>). IR (neat) 3022, 2932, 2890, 1560, 1452, 1090, 800 cm<sup>-1</sup>. <sup>1</sup>H NMR (400 MHz, CDCl<sub>3</sub>) δ 1.08 (s, 6H), 1.12-1.56 (m, 12H), 1.64 (d, *J* = 6.6 Hz, 3H), 2.26-2.39 (m, 1H), 2.36 (s, 3H), 2.50 (s, 3H), 2.94 (t, *J* = 9.6 Hz, 1H), 5.36 (d, *J* = 9.8 Hz, 1H), 6.43 (d, *J* = 7.8 Hz, 2H), 7.09 (d, *J* = 7.8 Hz, 2H), 7.37-7.49 (m, 5H), 7.63 (d, *J* = 7.8 Hz, 2H), 7.75 (d, *J* = 7.8 Hz, 2H). <sup>13</sup>C NMR (100 MHz, CDCl<sub>3</sub>) δ 13.2 (CH), 17.4 (CH<sub>2</sub>), 20.6 (CH<sub>3</sub>), 20.7 (CH<sub>3</sub>), 21.4 (CH<sub>3</sub>), 21.6 (CH<sub>3</sub>), 30.9 (CH<sub>3</sub>), 32.7 (2 CH<sub>3</sub>), 33.7 (CH), 33.9 (2 CH<sub>2</sub>), 60.0 (C), 60.7 (C), 70.2 (CH), 79.7 (C), 124.0 (CH), 125.6 (2 CH), 127.8 (2 CH), 128.4 (2 CH), 129.5 (2 CH), 129.7 (2 CH), 130.0 (2 CH), 138.8 (C), 139.0 (C), 139.2 (C), 141.1 (C), 142.2 (C). HRMS: Calc. for C<sub>34</sub>H<sub>43</sub>NO<sub>3</sub>S<sub>2</sub>Na [M+Na]<sup>+</sup> 600.2582, found 600.2577.

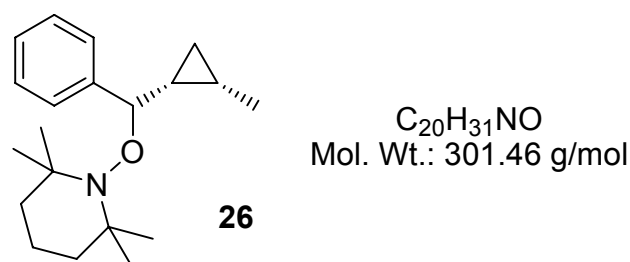

To a solution of compound **25** (100 mg, 0.17 mmol) in ethanol (20 mL) is added 2 mL of Raney Ni as a water suspension (50% w/v). The flask is successively purged by an argon flow and an hydrogen flow. Then, the reaction is stirred under an hydrogen atmosphere during 2 hours. The reaction flask is purged by an argon flow and the crude mixture is filtered over a pad of celite. The celite pad is washed by ethanol and the solvent is removed under vacuum. The crude is purified by flash chromatography over silica gel (pentane/diethyl ether: 95/5) to afford the compound **26** (46 mg, 91%) as a pale yellow oil:  $[\alpha]_D^{20} + 79$  (c 1.01; CHCl<sub>3</sub>). IR (neat) 3062, 2997, 2926, 2870, 1492, 1375, 1359 cm<sup>-1</sup>. <sup>1</sup>H NMR (400 MHz, CDCl<sub>3</sub>) δ -0.27 (m, 1H), 0.66 (ddd, *J* = 8.8, 8.8, 4.8 Hz, 1H), 0.92 (s, 3H), 1.06 (s, 3H), 1.23-1.60 (m, 11H), 1.34 (d, *J* = 6.3 Hz, 3H), 1.45 (s, 3H), 4.36 (d, *J* = 8.8 Hz, 1H), 7.21-7.43 (m, 5H). <sup>13</sup>C NMR (100 MHz, CDCl<sub>3</sub>) δ 11.8 (CH<sub>2</sub>), 13.9 (CH), 15.9 (CH<sub>3</sub>), 17.5 (CH<sub>2</sub>), 20.5 (CH<sub>3</sub>), 20.8 (CH<sub>3</sub>), 24.4 (CH<sub>3</sub>),

Supplementary Material (ESI) for Chemical Communications

This journal is (c) The Royal Society of Chemistry 2007

33.6 (CH), 33.9 (CH<sub>3</sub>), 40.1 (CH<sub>2</sub>), 40.6 (CH<sub>2</sub>), 59.6 (C), 60.4 (C), 84.7 (CH), 126.7 (CH), 127.2 (2 CH), 127.9 (2 CH), 144.3 (C). HRMS: Calc. for C<sub>20</sub>H<sub>32</sub>NO [M+H]<sup>+</sup> 302.2485, found 302.2477.



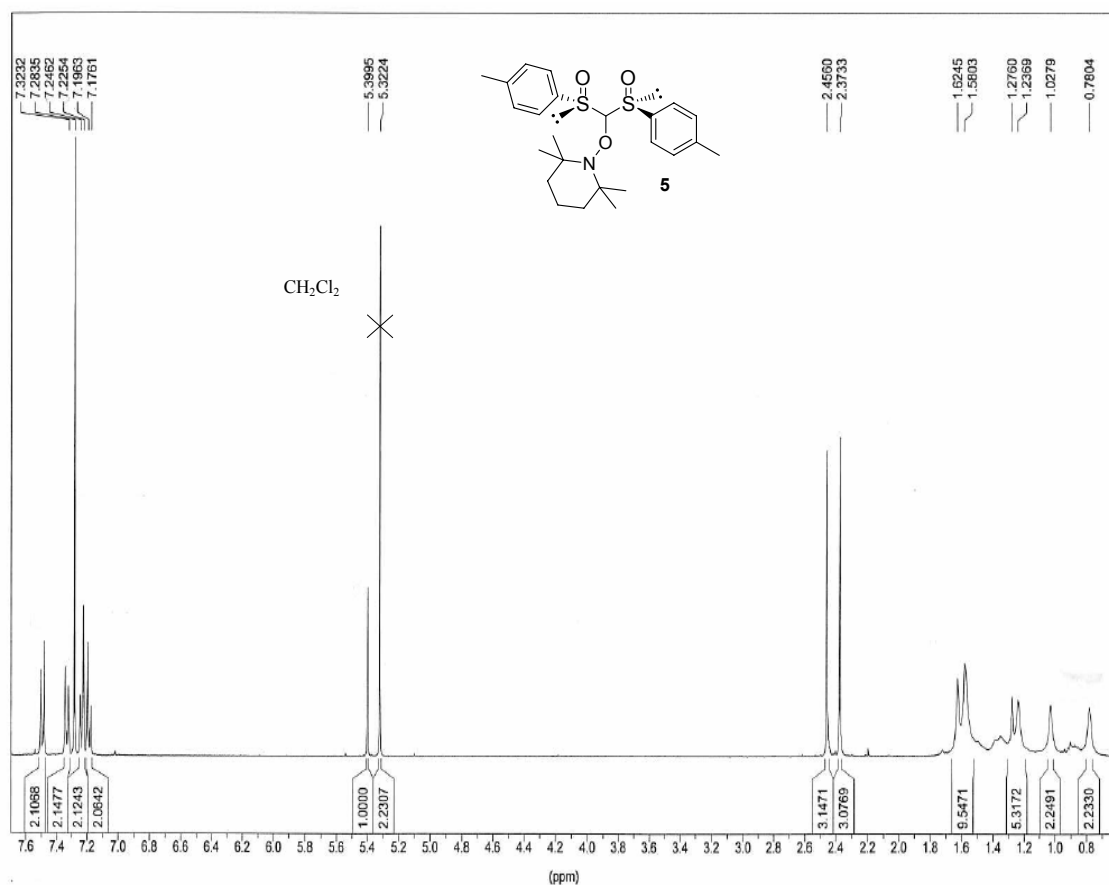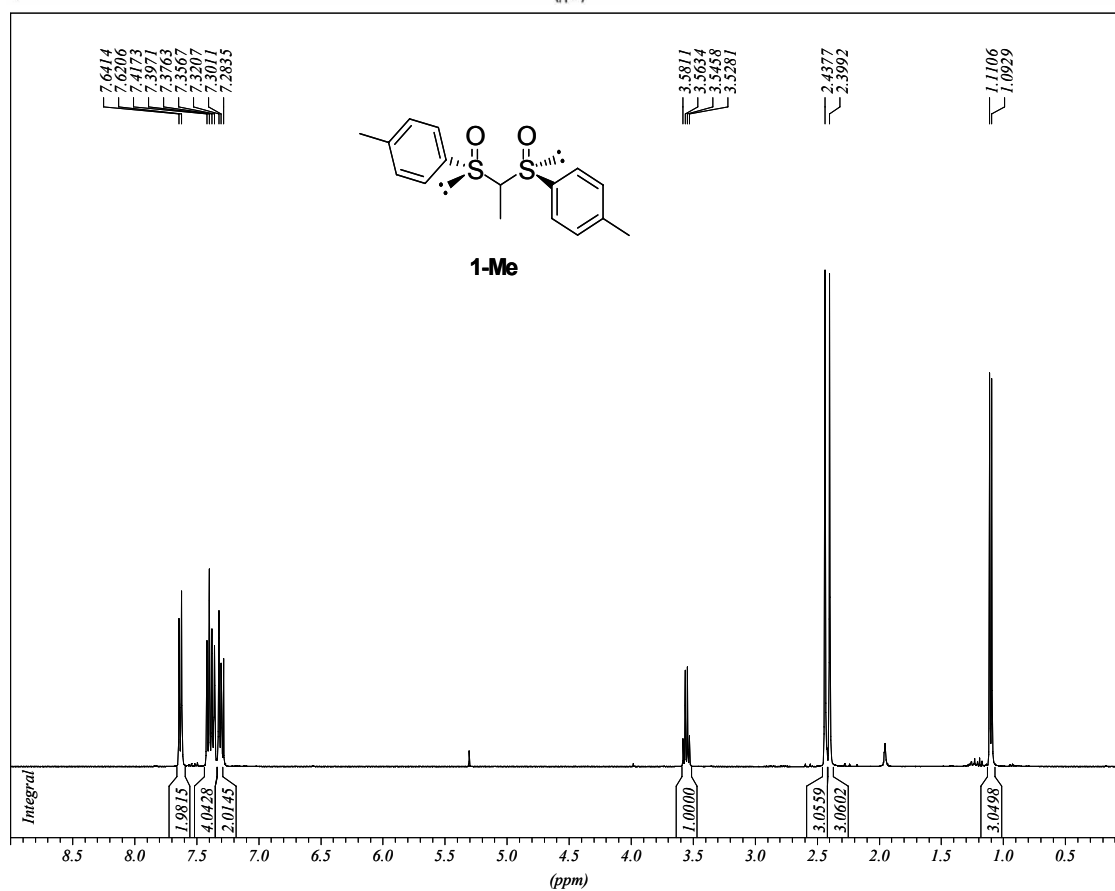

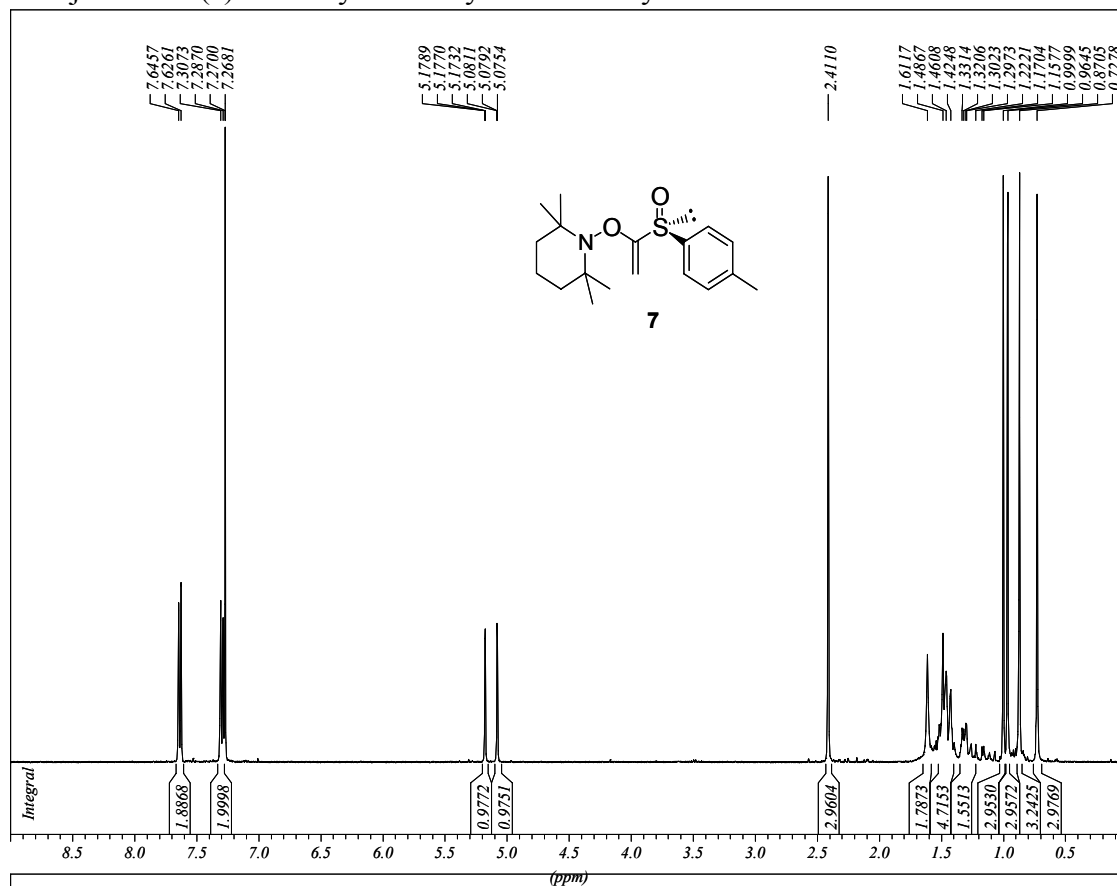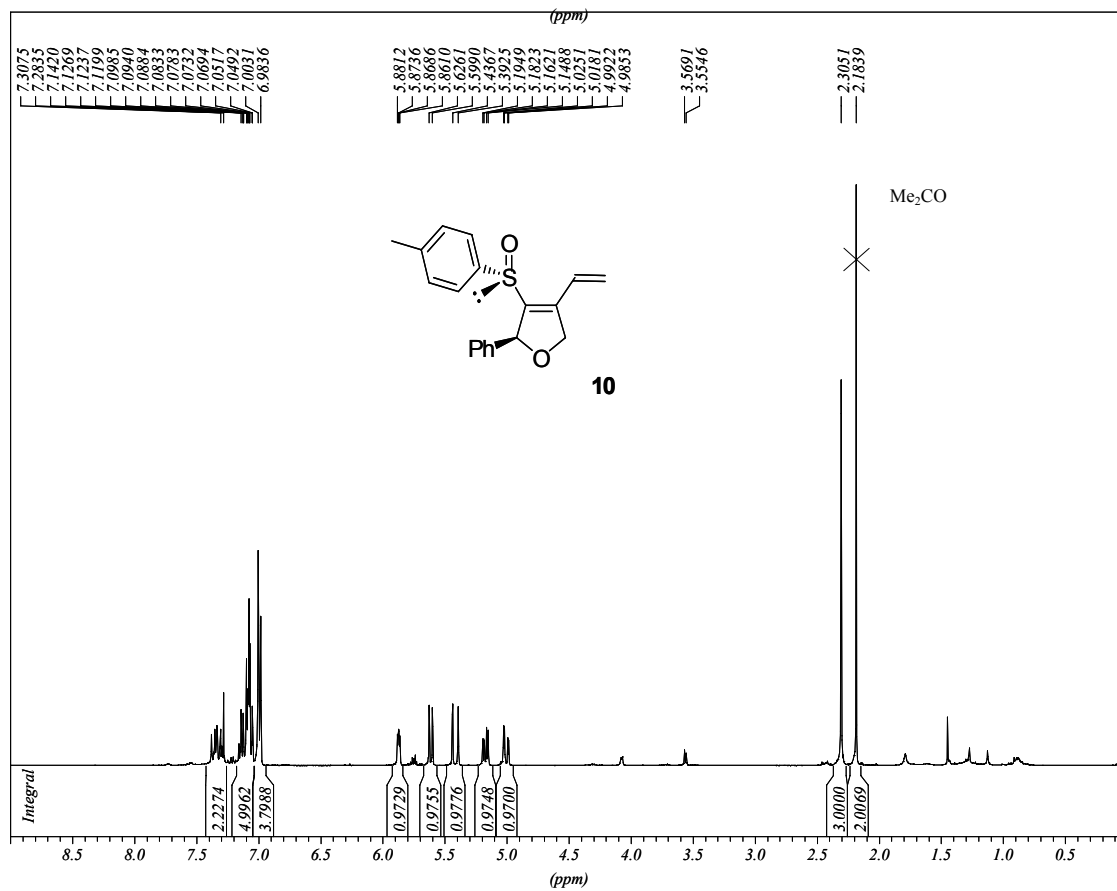

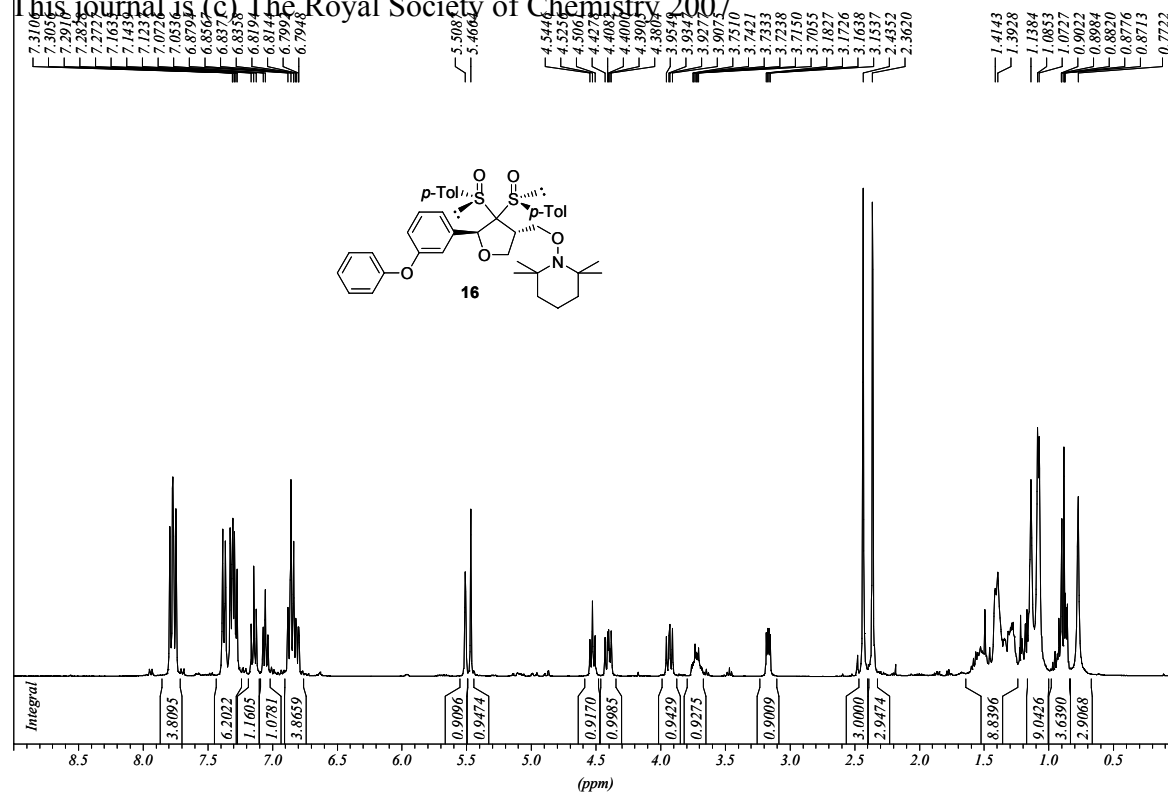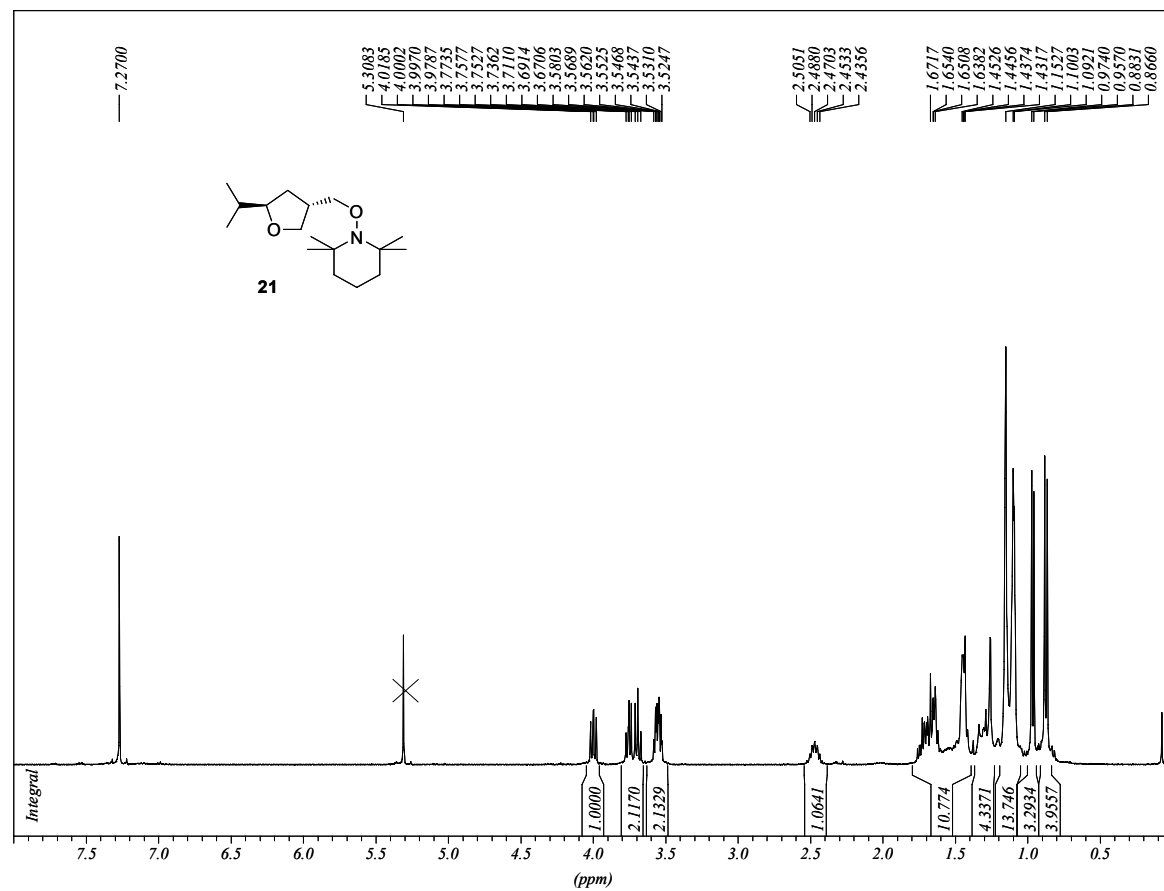

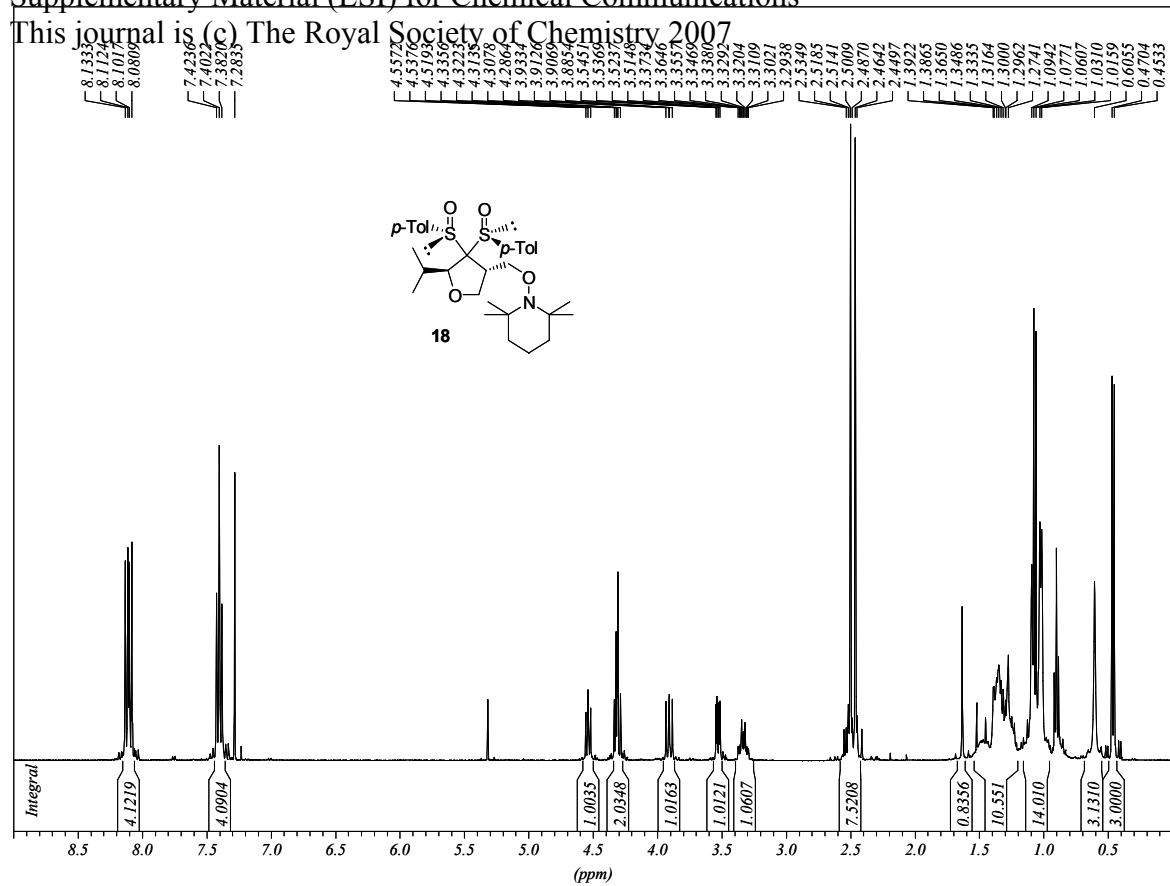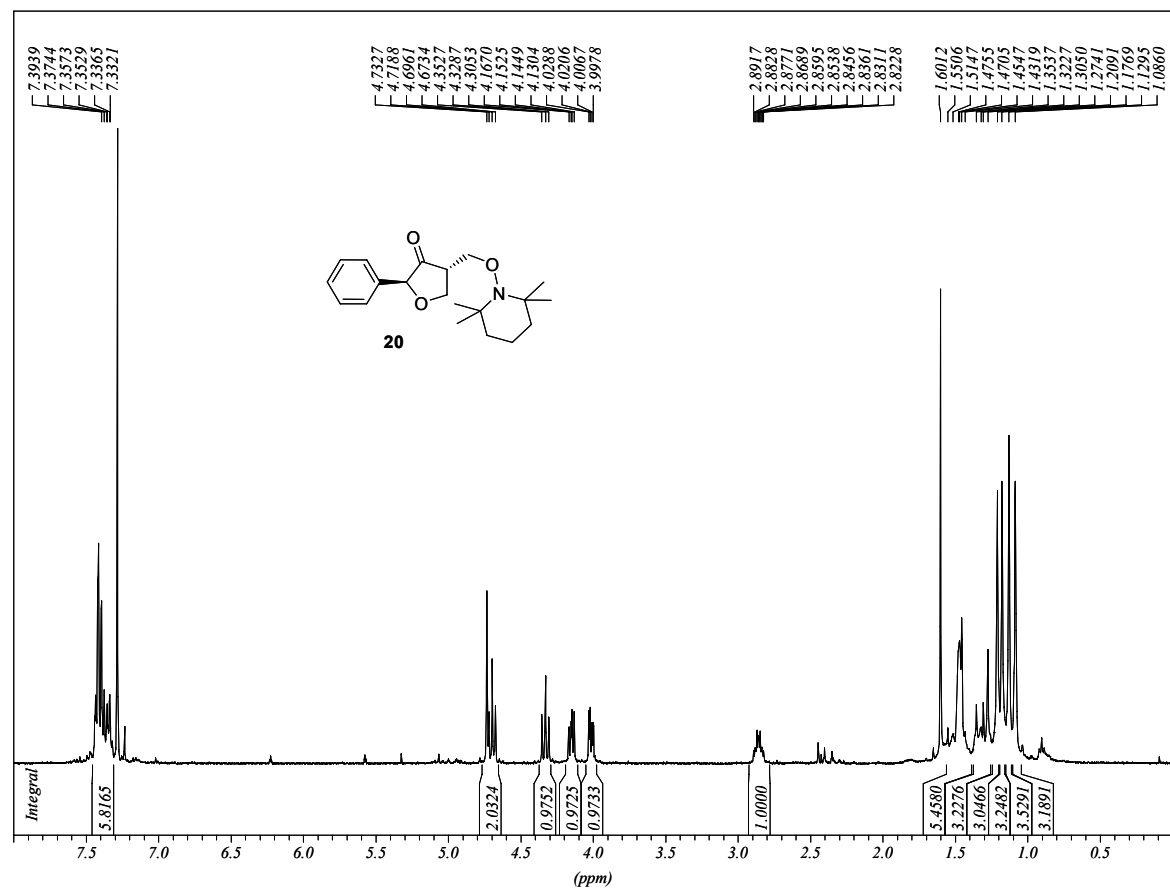

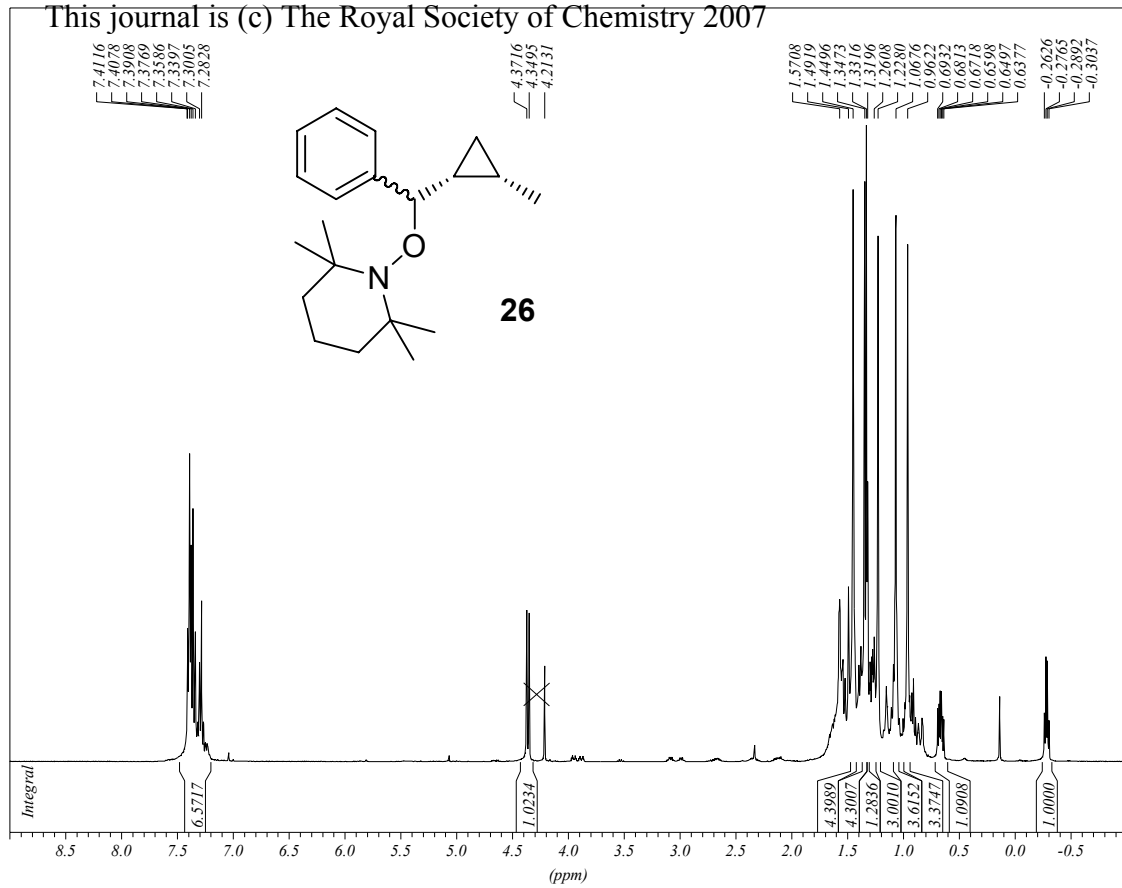

Supplement: b705284g.pdf [file b705284g.pdf]
